# Supplementary material for: Lack of 17β-estradiol reduces sensitivity to insulin in the liver and muscle of male mice
Source: PubMed Central journal article supplement (PMC6134327; doi:10.1016/j.heliyon.2018.e00772), 2018-09-11

pAkt T308

liver insulin 10 min

liver insulin 60 min

STRATAGENE®  
CM  
1  
2  
3  
4  
5  
6

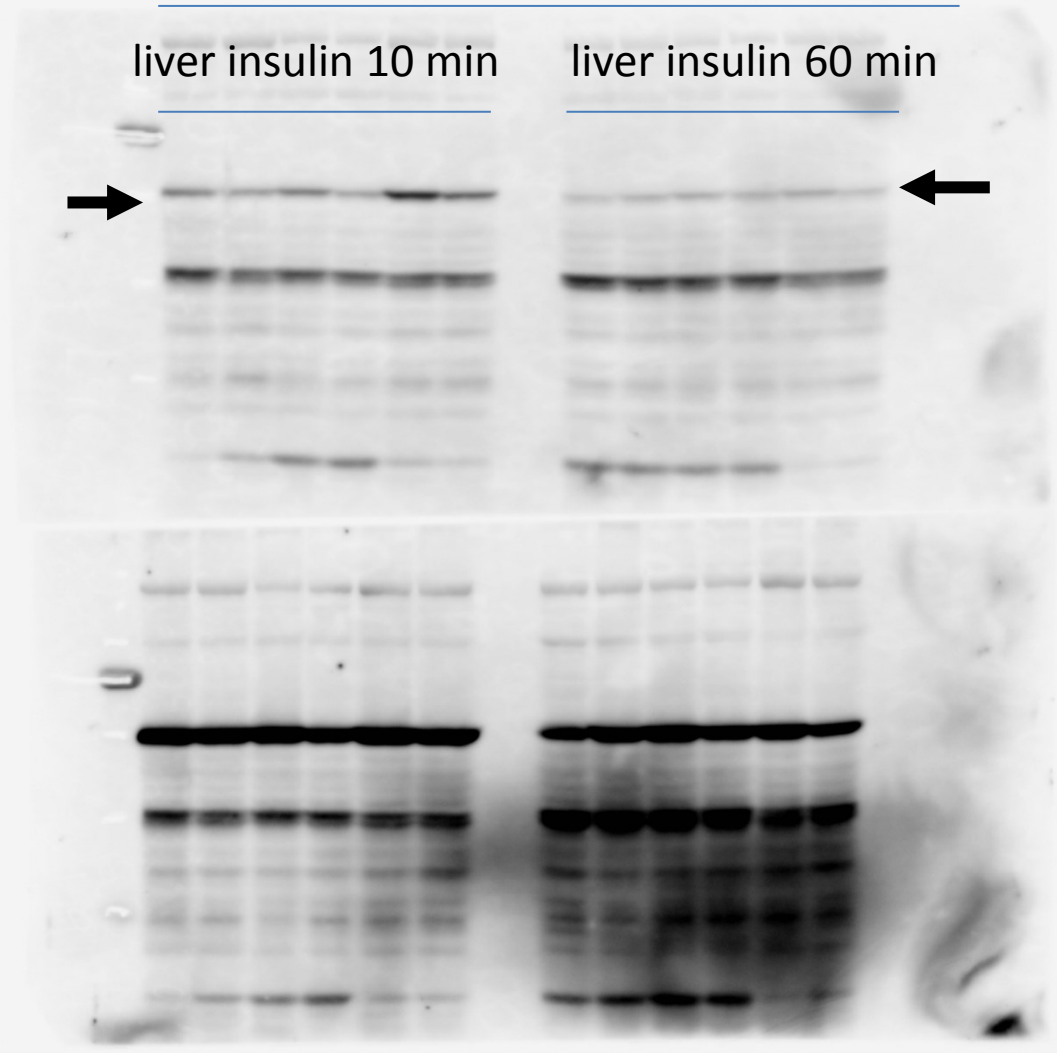

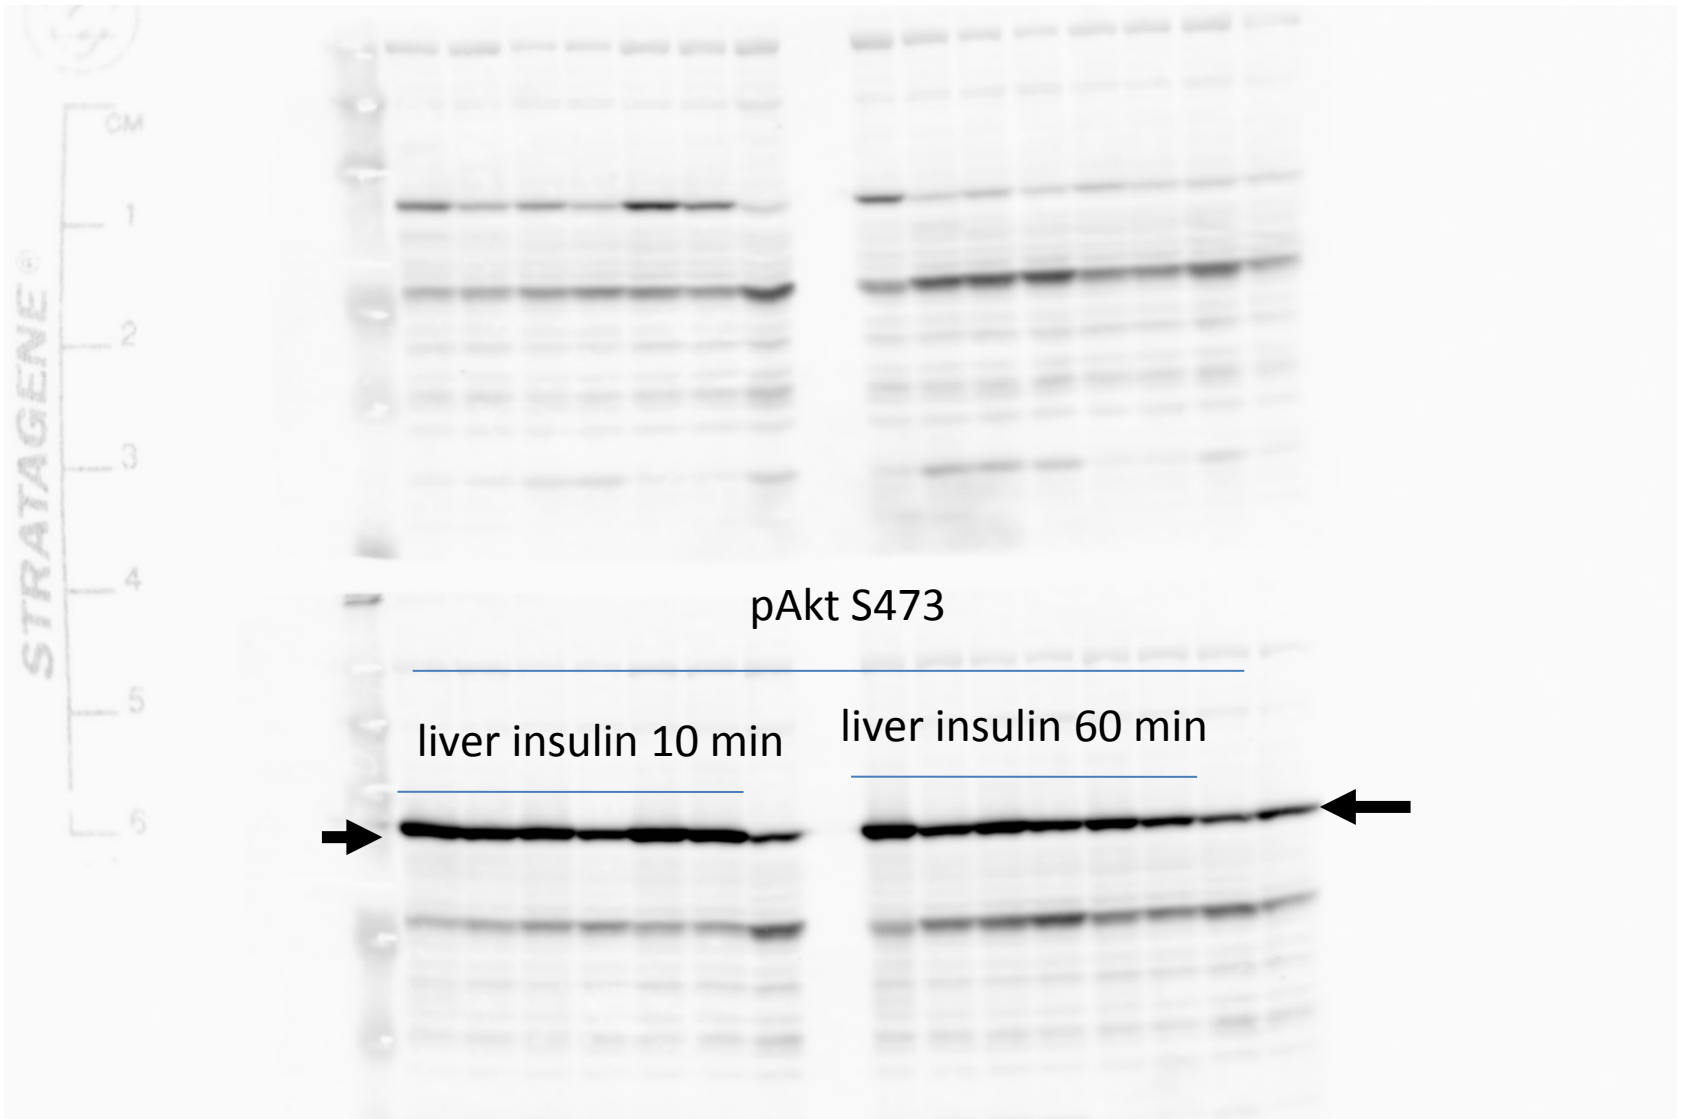

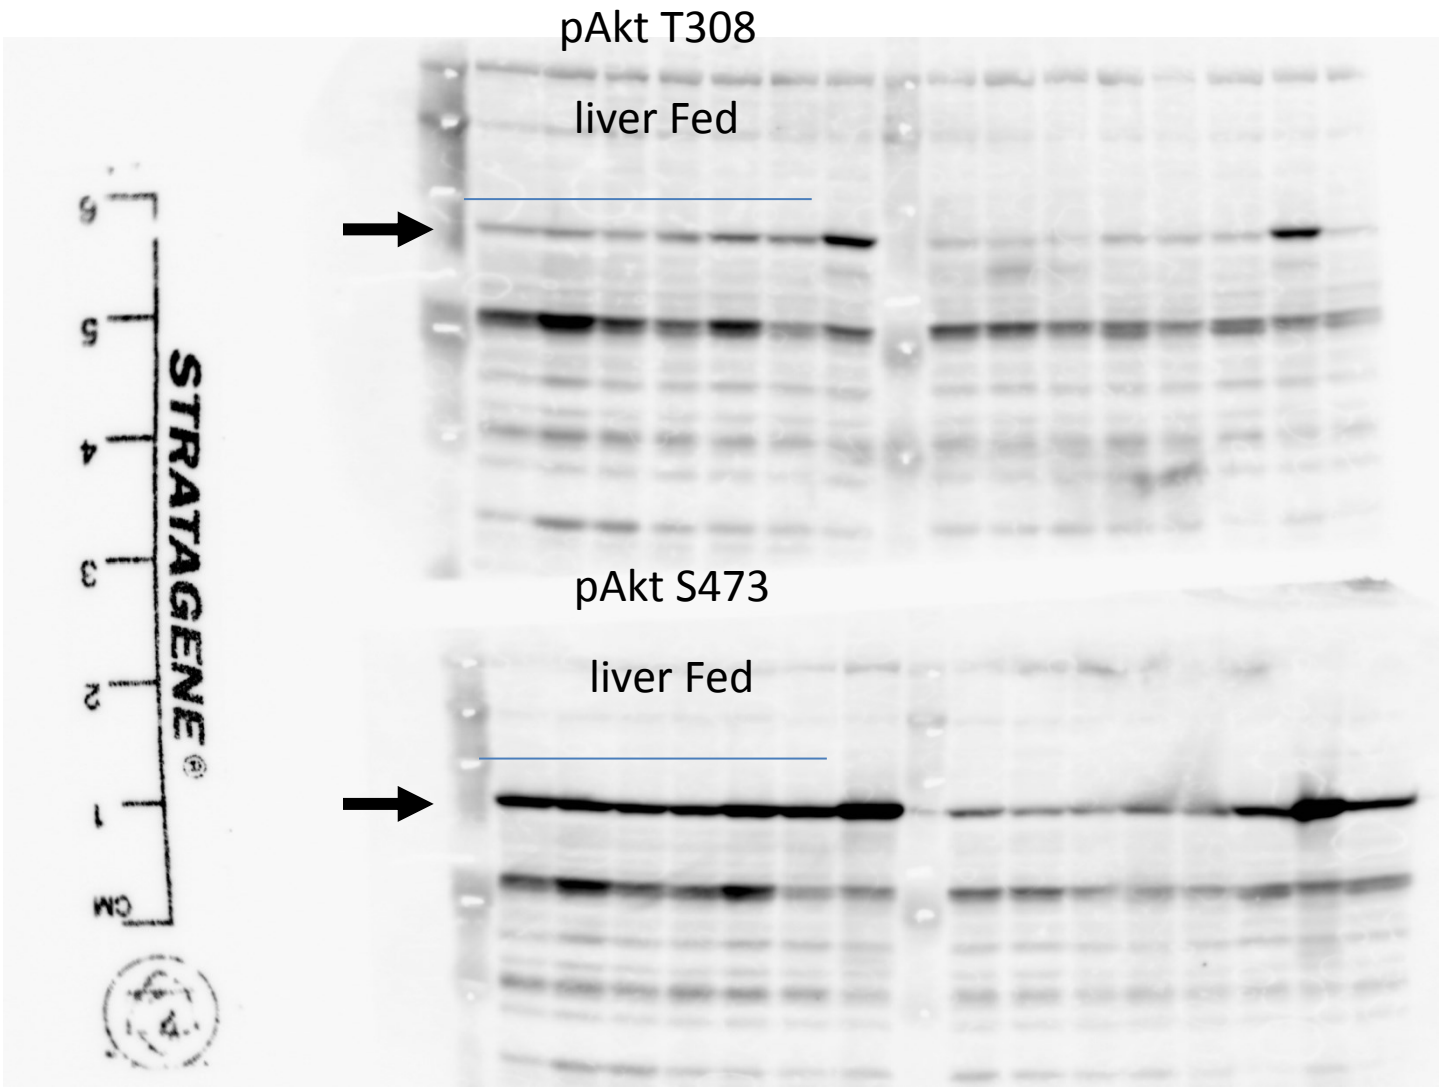

Akt

Akt

liver insulin 10 min

liver insulin 60 min

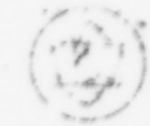

STRATAGENE®  
CM  
1  
2  
3  
4  
5  
6

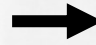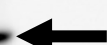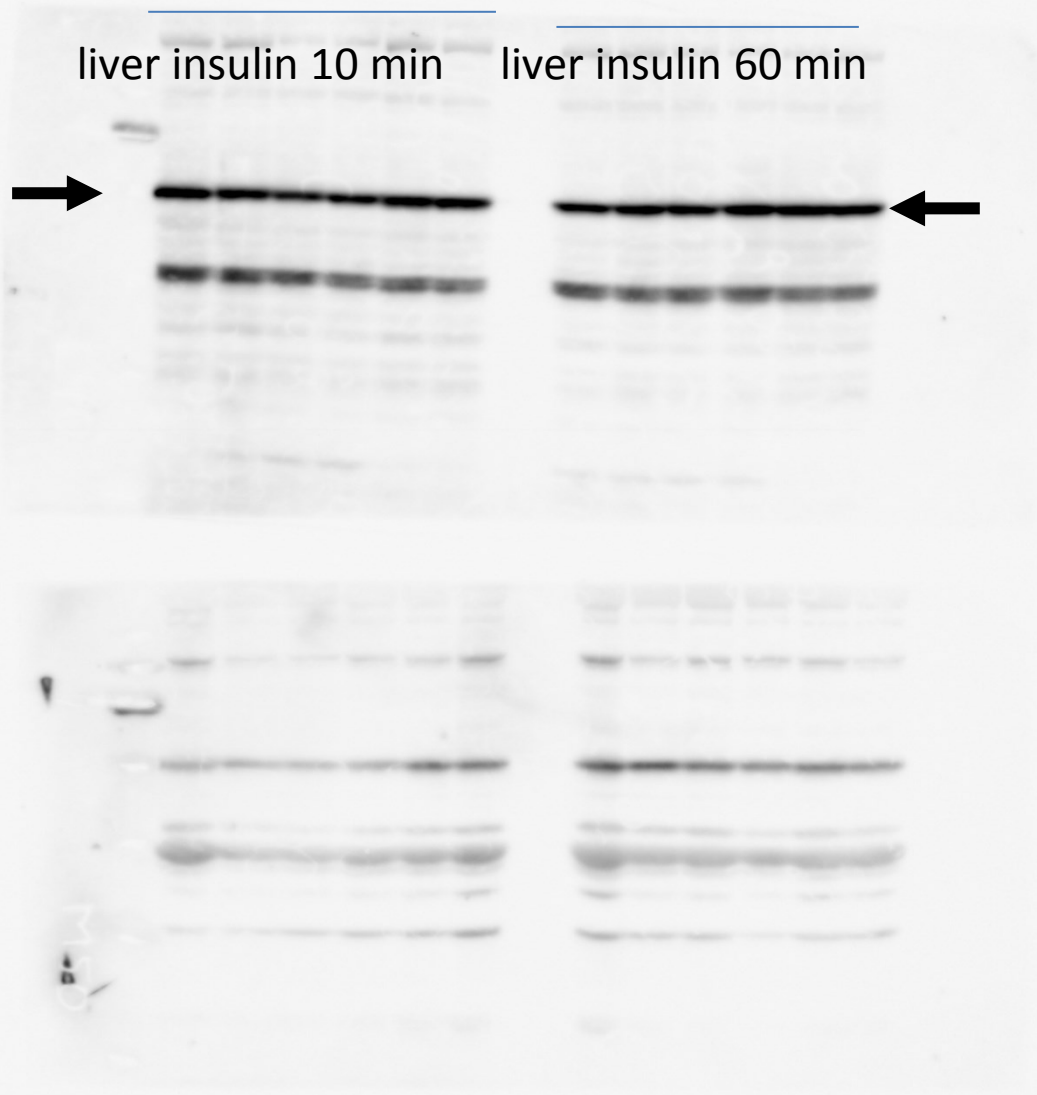

Akt

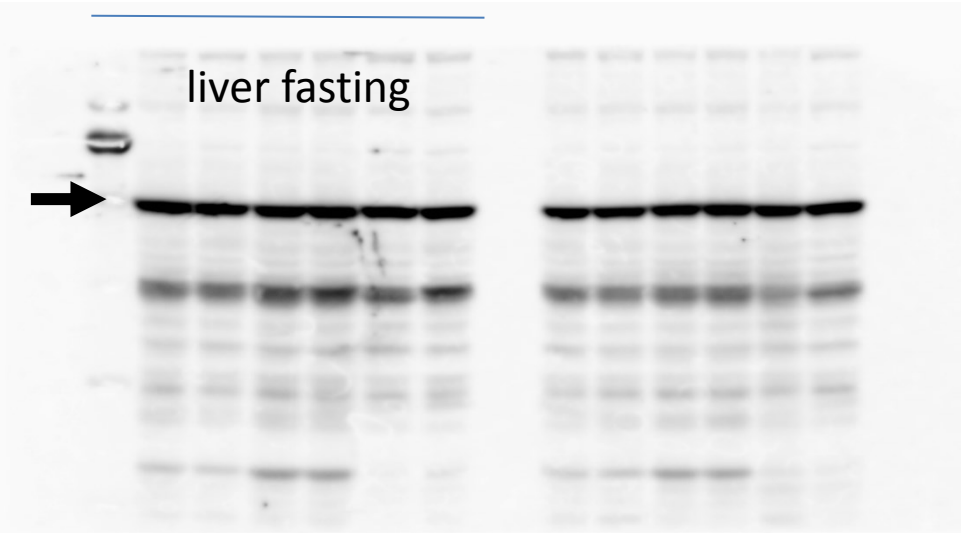

pAkt S473

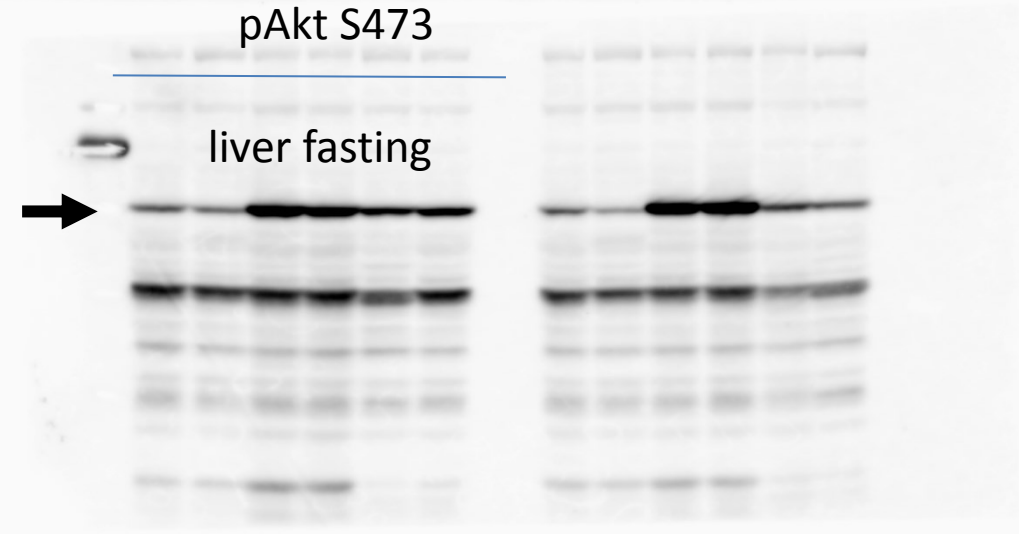

STRATAGENE®  
CM  
1  
2  
3  
4  
5  
6

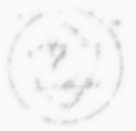

STRATAGENE<sup>®</sup>  
CM  
1  
2  
3  
4  
5  
6

Akt

liver fed

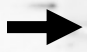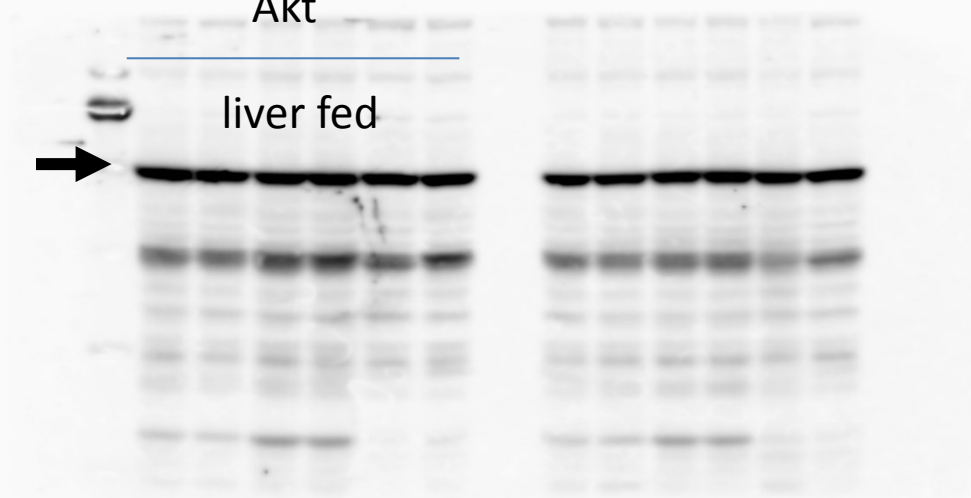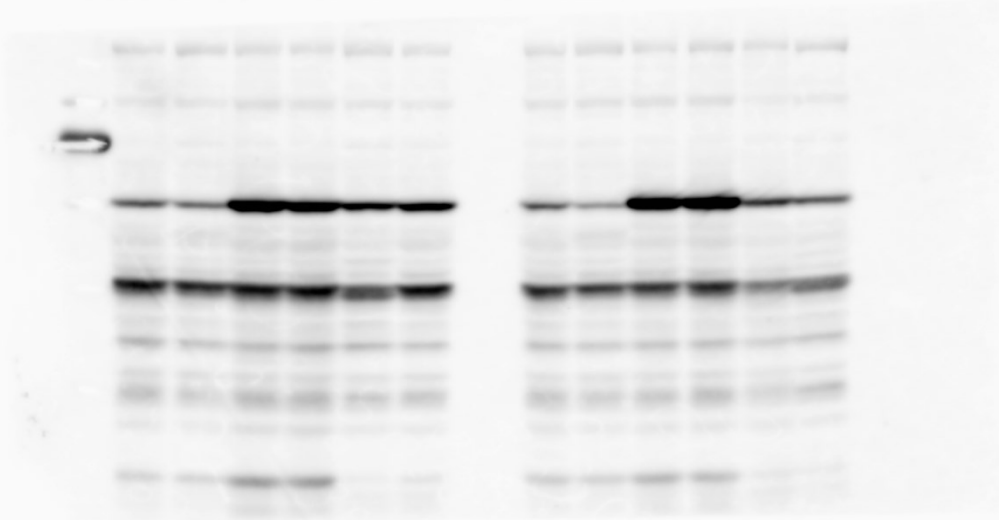

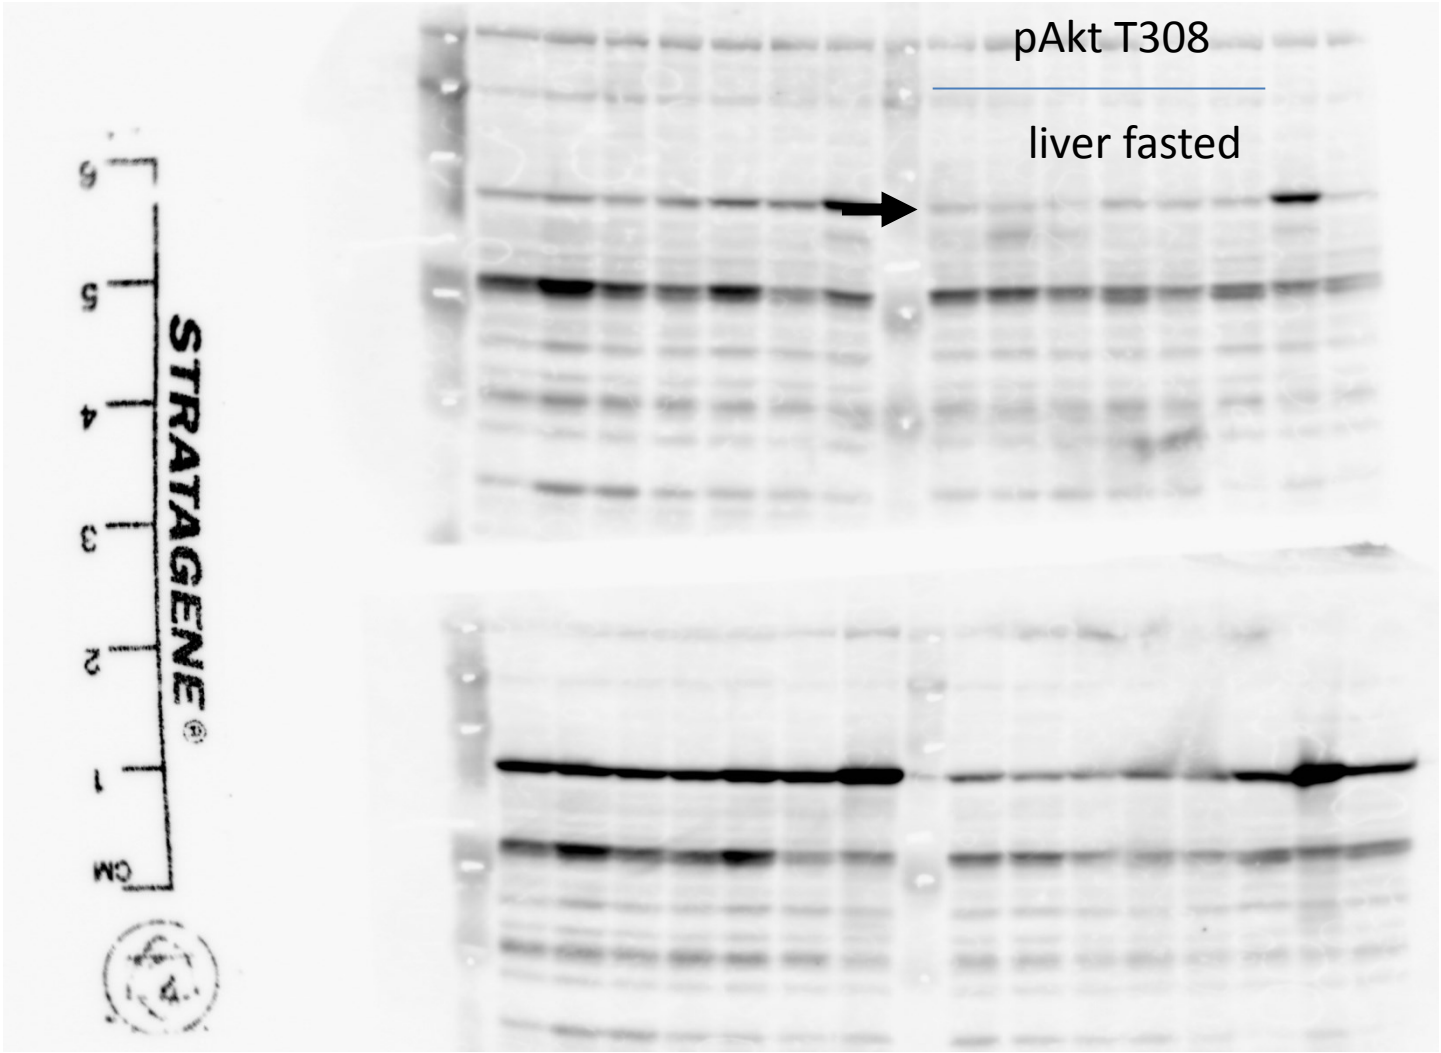

Supplement: mmc1.pdf [file mmc1.pdf]
