# Supplementary material for: Lack of 17β-estradiol reduces sensitivity to insulin in the liver and muscle of male mice
Source: PubMed Central journal article supplement (PMC6134327; doi:10.1016/j.heliyon.2018.e00772), 2018-09-11

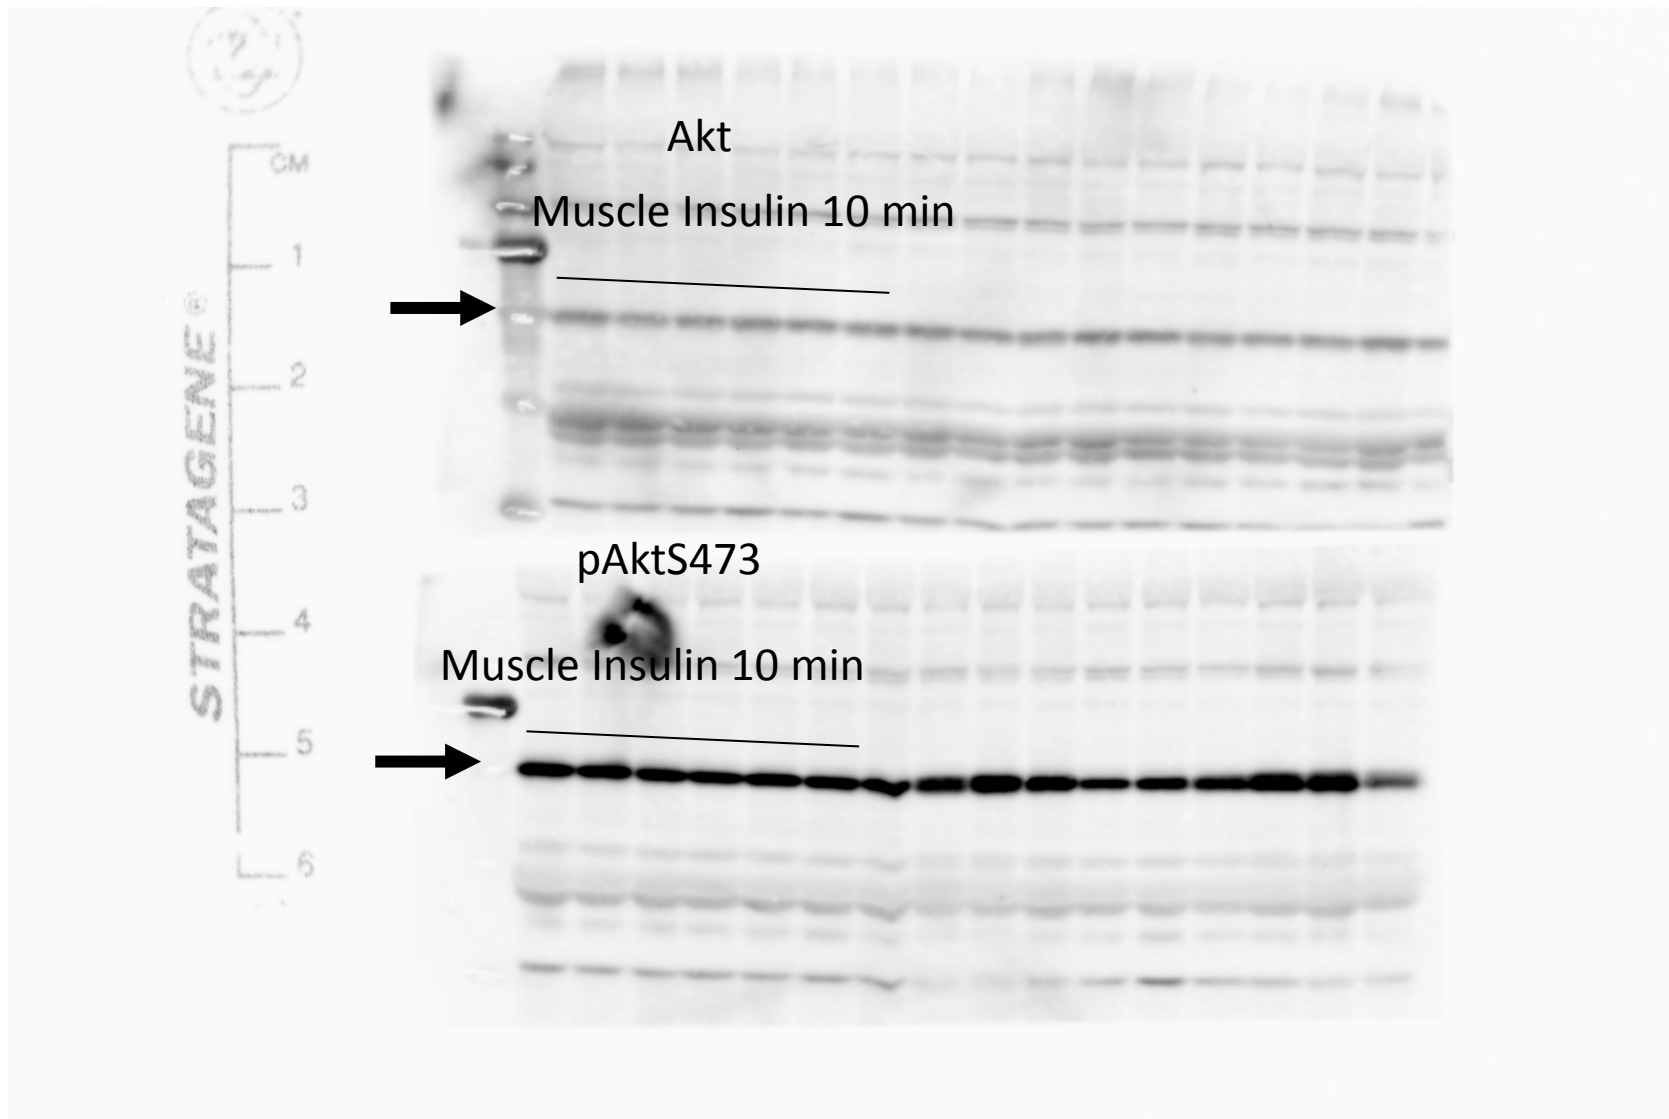

STRATAGENE<sup>®</sup>  
CM  
1  
2  
3  
4  
5  
6

Akt

Muscle Fed

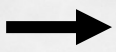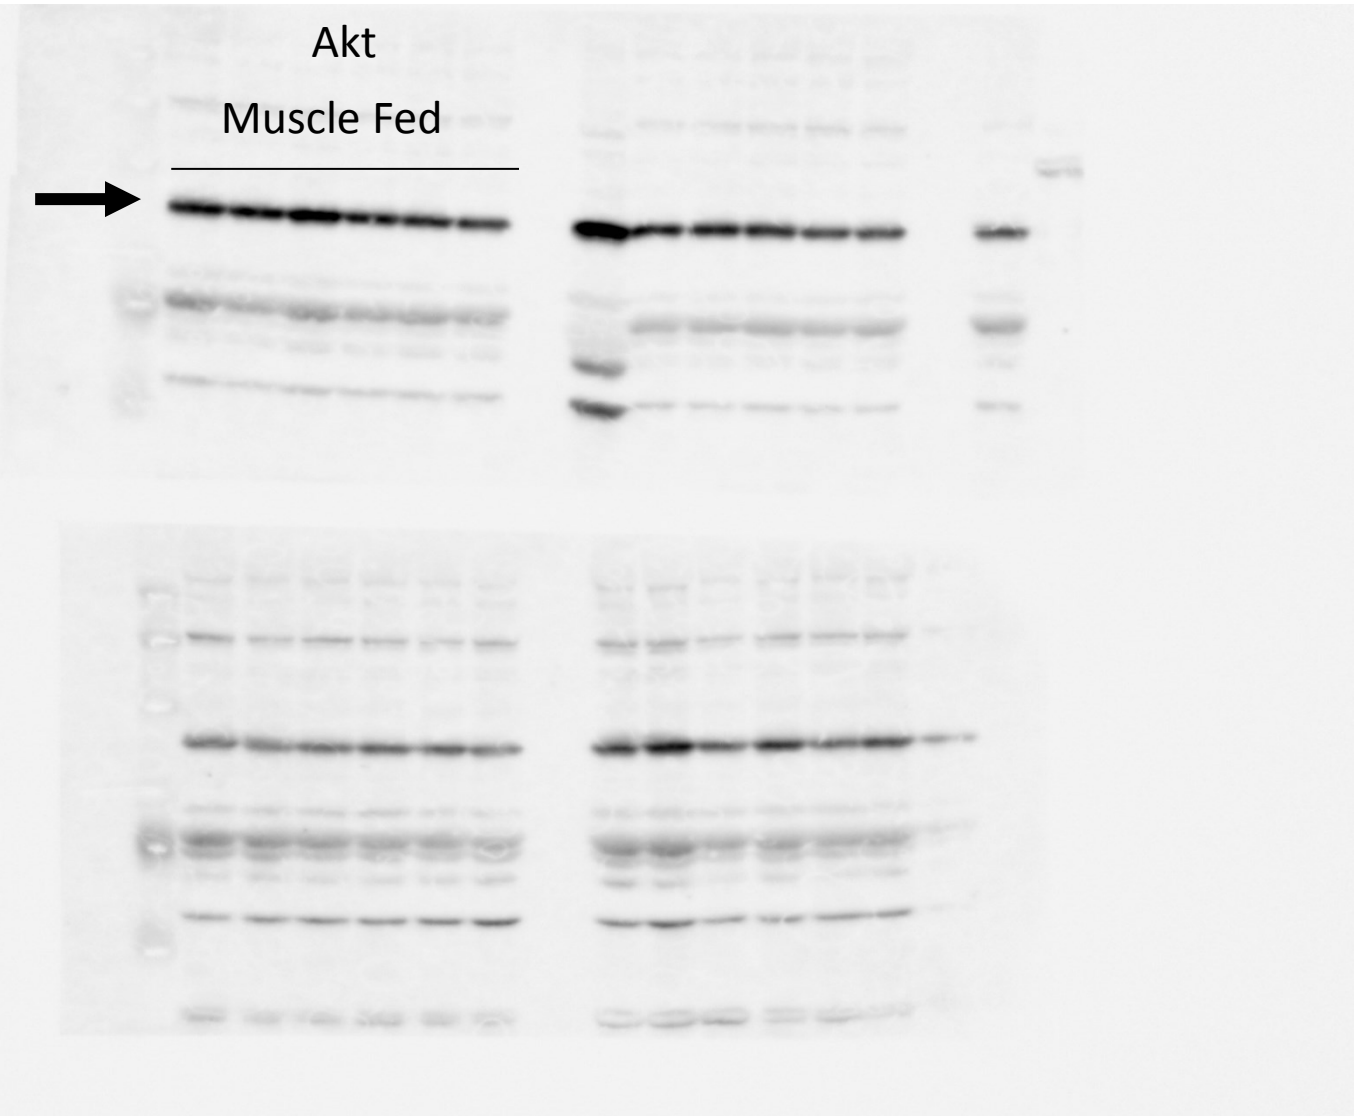

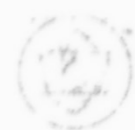

STRATAGENE®  
CM  
1  
2  
3  
4  
5  
6

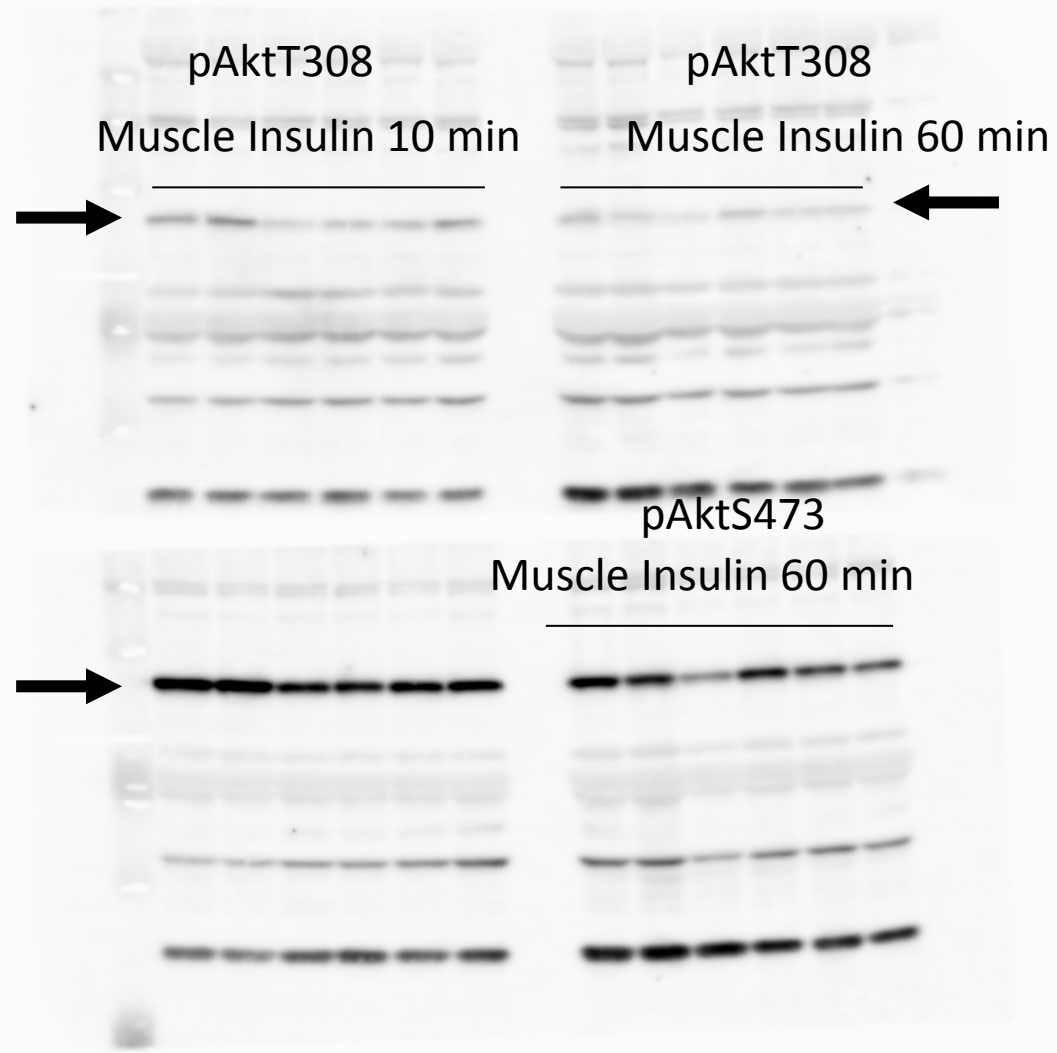

pAktT308

STRATAGENE®  
CM  
1  
2  
3  
4  
5  
6

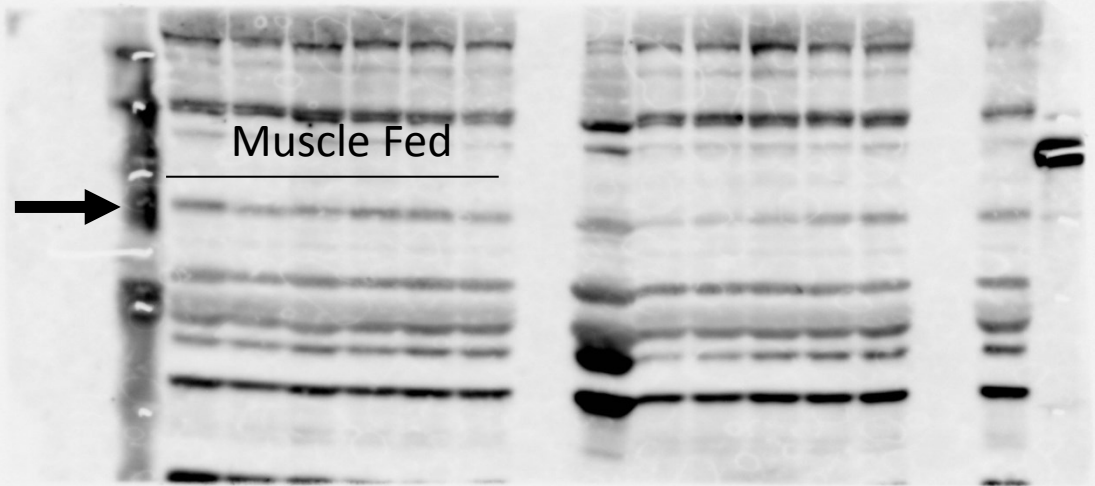

pAktS473

Muscle Fed

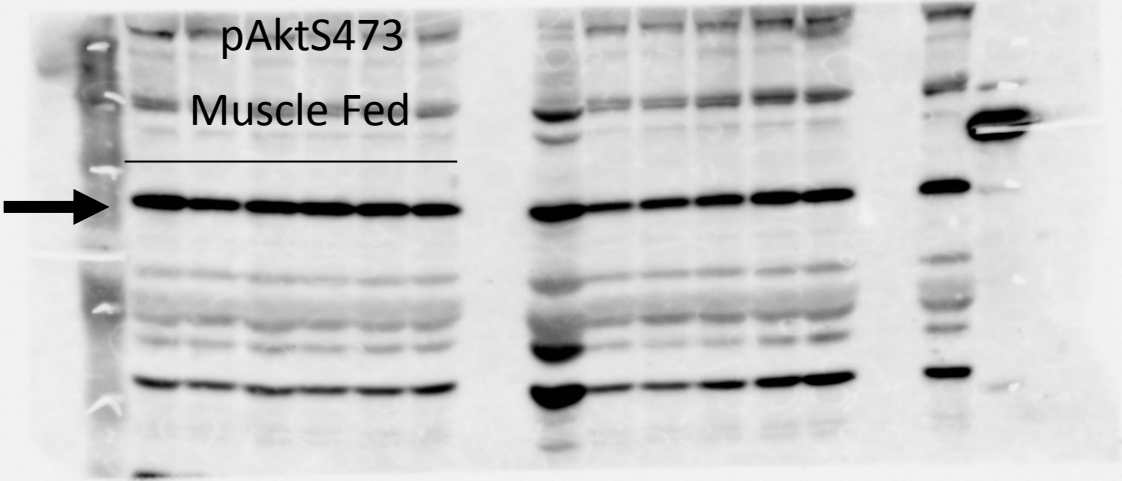

AktT

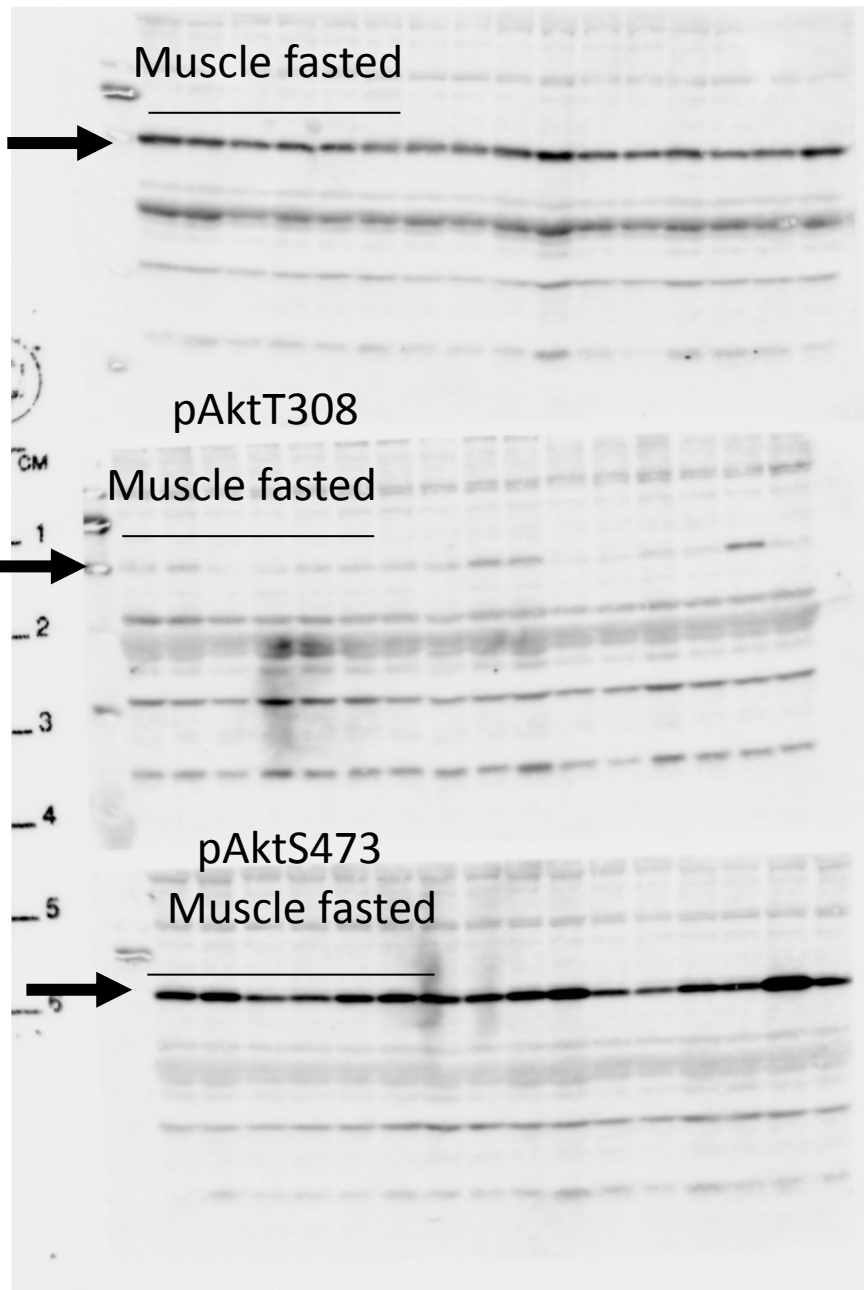

Muscle fasted

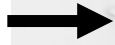

pAktT308

CM

Muscle fasted

1

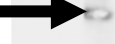

2

3

4

pAktS473

5

Muscle fasted

6

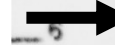

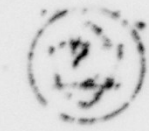

STRATAGENE®  
CM  
1  
2  
3  
4  
5  
6

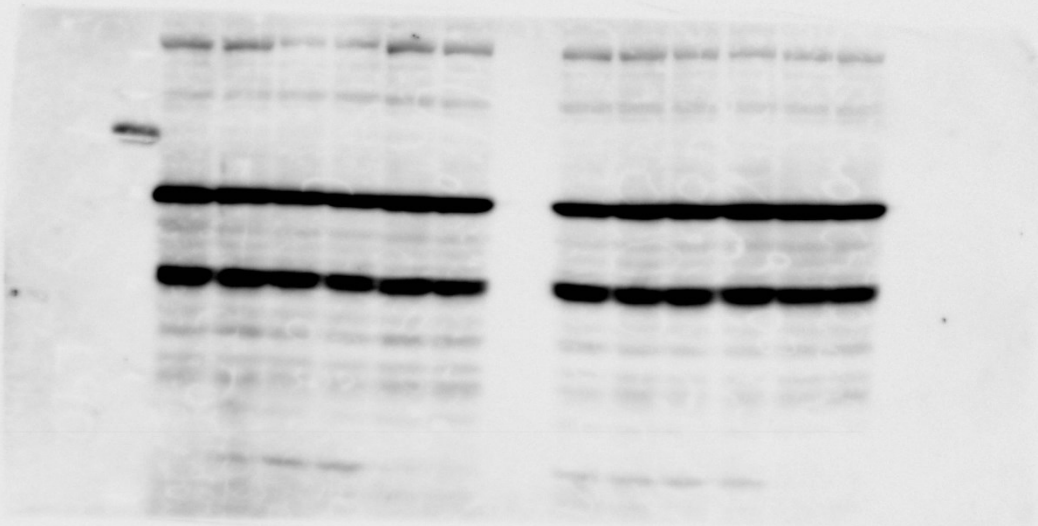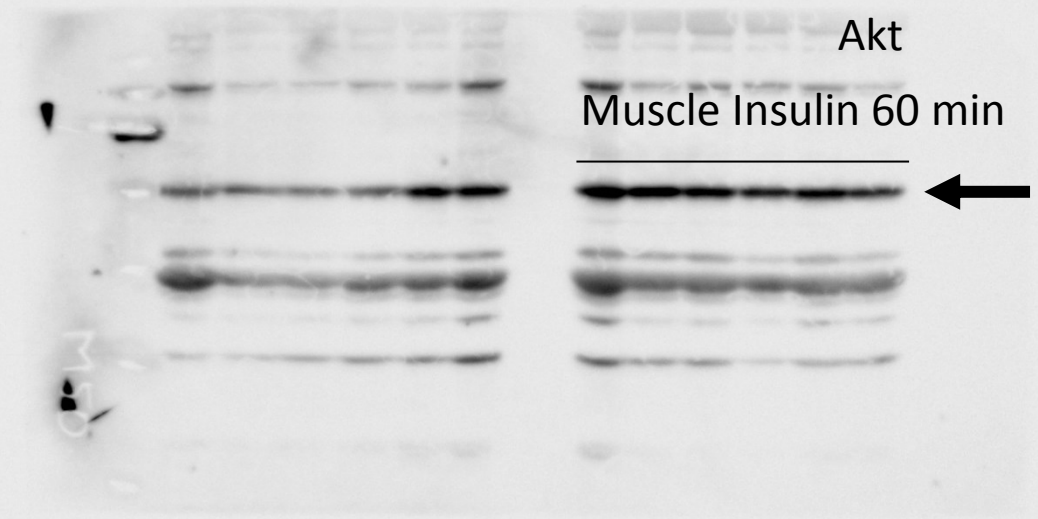

Akt

Muscle Insulin 60 min

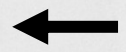

Supplement: mmc2.pdf [file mmc2.pdf]
